# Supplementary material for: SnO2-Based Ultra-Flexible Humidity/Respiratory Sensor for Analysis of Human Breath
Source: MDPI journal article supplement (doi:10.3390/bios13010081), 2023-01-03
Supplement: s1 [file s1]

Supporting Information

# SnO<sub>2</sub>-Based Ultra-flexible Humidity/Respiratory Sensor for Analysis of Human Breath

Moumita Deb <sup>1,2</sup>, Mei-Yu Chen <sup>3</sup>, Po-Yi Chang <sup>1,2,4,5</sup>, Pin-Hsuan Li <sup>1,2</sup>, Ming-Jen Chan <sup>6,7,8</sup>, Ya-Chung Tian <sup>6,7</sup>, Ping-Hung Yeh <sup>3</sup>, Olivier Soppera <sup>4,5,\*</sup> and Hsiao-Wen Zan <sup>1,2,\*</sup>

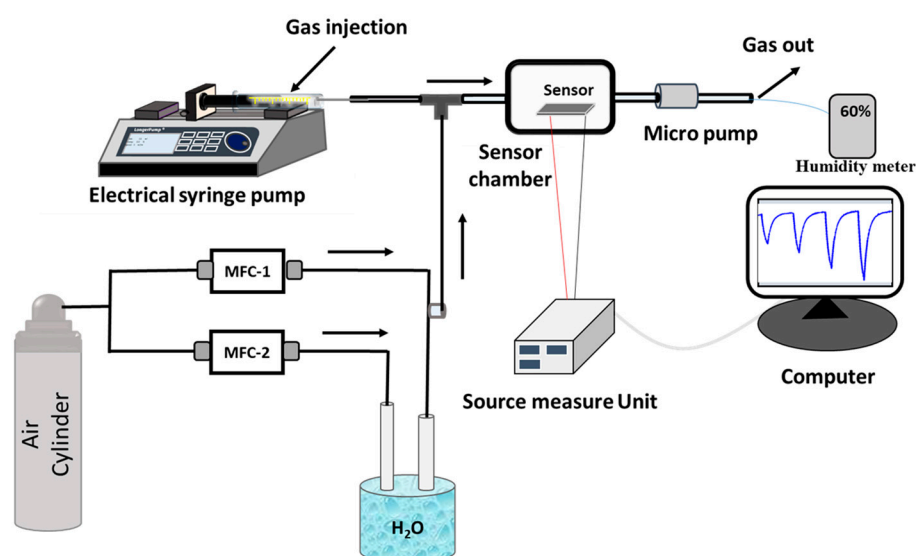

**Figure S1.** Diagram of sensor measurement system.

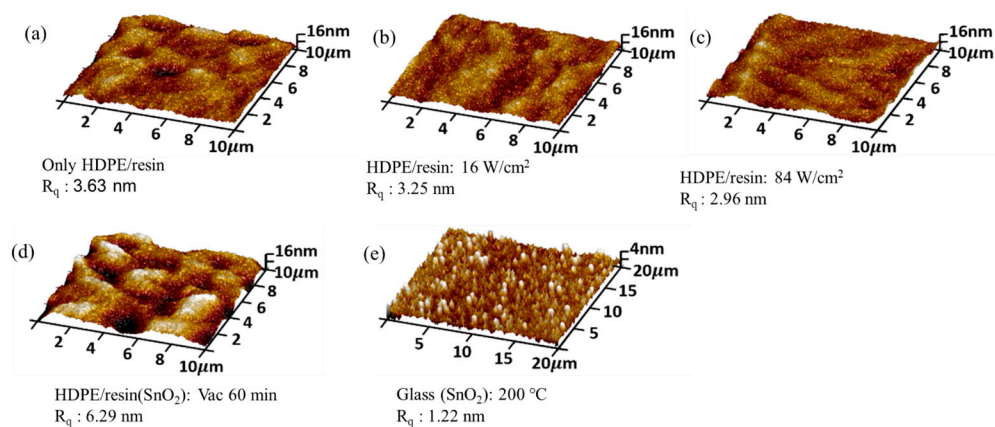

**Figure S2.** AFM images of (a) Only HDPE/resin. (b) HDPE/resin under NIR laser power 16 W/cm<sup>2</sup> and (c) 84 W/cm<sup>2</sup>. (d) HDPE/resin /SnO<sub>2</sub>: S–vac (e) Glass/SnO<sub>2</sub> under thermal annealing at 200 °C.

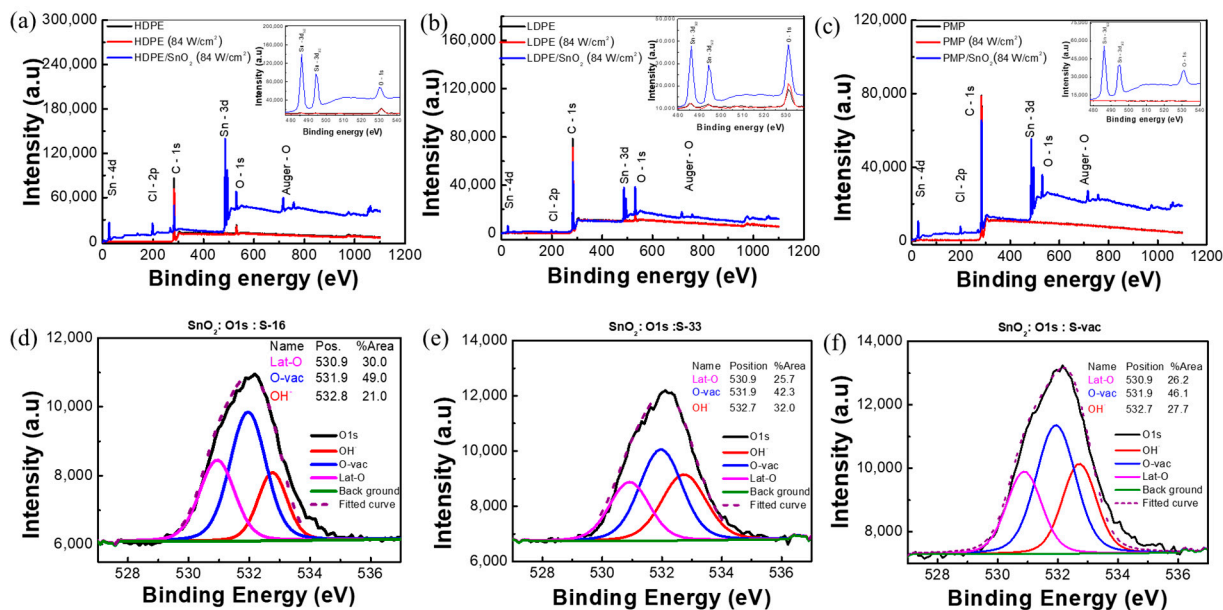

**Figure S3.** XPS data of (a) HDPE/resin, (b) LDPE, (c) PMP before (only substrate, substrate with NIR irradiation 84 W/cm<sup>2</sup>) and after depositing film (SnO<sub>2</sub> film with NIR irradiation 84 W/cm<sup>2</sup>). XPS O-1s for (d) S-33, (e) S-84 and (f) S-vac.

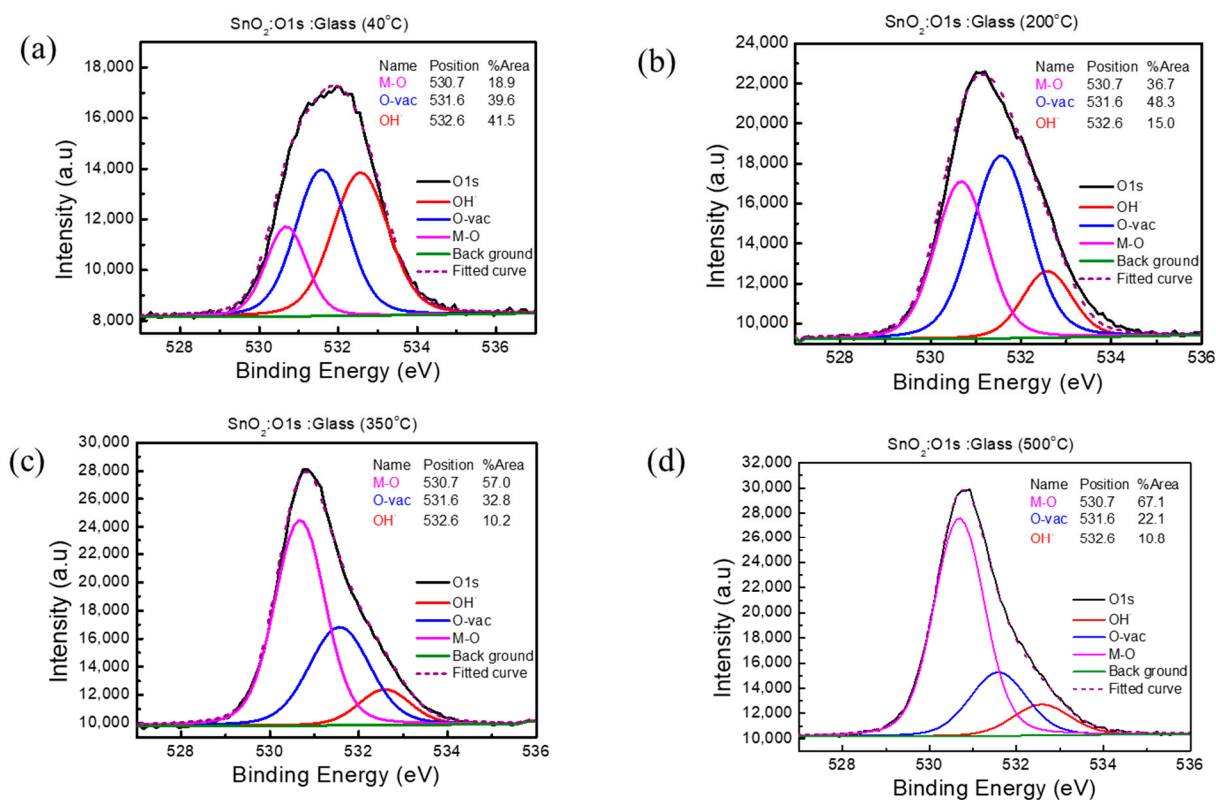

**Figure S4.** SnO<sub>2</sub>: O-1s data of thermally annealed film at (a) 40 °C, (b) 200 °C, (c) 350 °C, and (d) 500 °C.

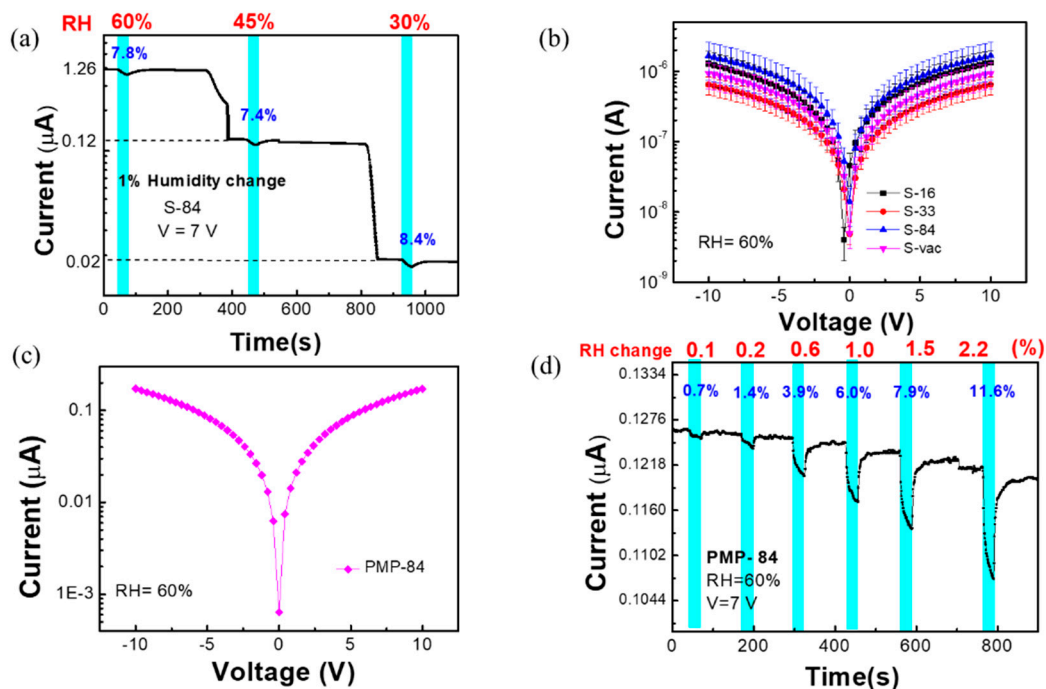

**Figure S5.** (a) Real time measurement of 1% RH changes under different relative humidity (b) I-V of different sensors (S-16, S-33, S-84, S-vac) under 60% RH (c, d) I-V and incremental-change of humidity response of **PMP-84** under 0.1% to 2.2% RH.

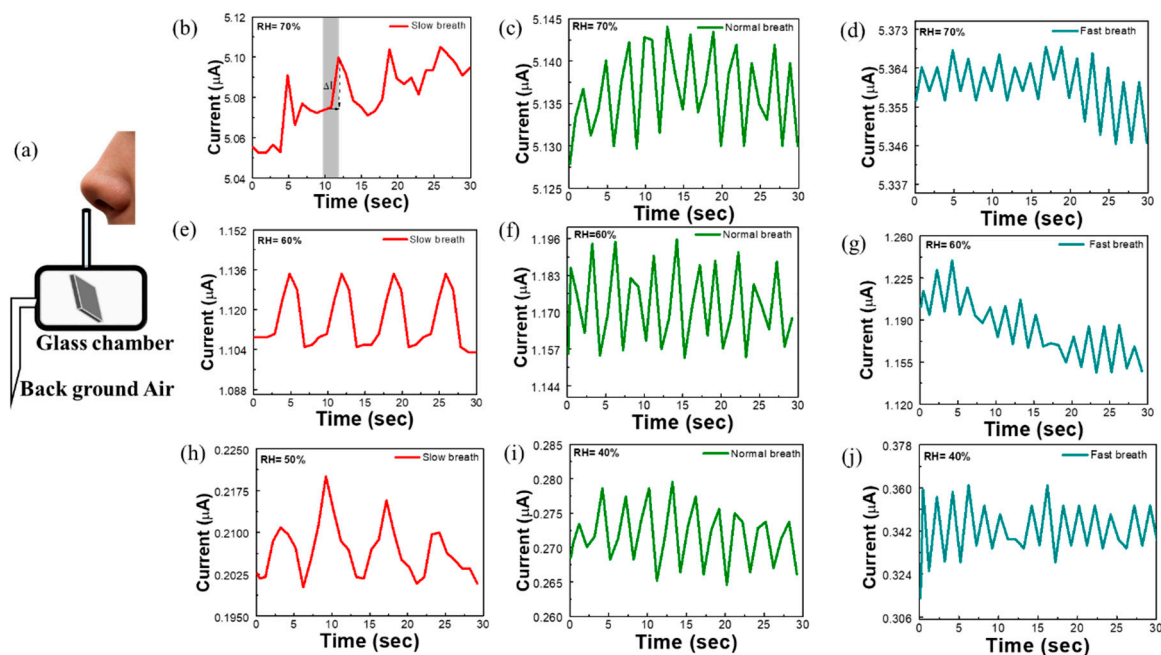

**Figure S6.** (a) Image of breath analysis inside glass chamber. The continuous slow, normal, and fast nasal breath was released from 5 cm away from substrates under different background relative humidity environment such as; (b-d) 70% RH (e-g) 60% RH, and (h-j) 50%.

**Table S1.** Recent flexible humidity sensor.

| Material                   | Substrate (Thick.)    | Deposition method | Anneal temperature              | Dynamic range | Response (%) / RH%   | Res/Rec time        | Reference        |
|----------------------------|-----------------------|-------------------|---------------------------------|---------------|----------------------|---------------------|------------------|
| Graphene/ Ag colloids      | PET (0.2-0.7 mm)      | CVD               | Infrared lamp                   | 11-97         | 3.5/97               | 54/ 132 s           | [17]             |
| GNCP                       | PI (0.125 mm)         | Drop cast         | Evaporate close condition/ 12 h | 0-90          | 20,00,000/90         | 20/17 ms            | [22]             |
| MWCNTs/ PLL                | PI                    | Drop cast         | 60 °C/ 24 h                     | 0-91.5        | 659.97/91.5 ~200/ 70 | 19/472 s            | [23]             |
| Cellulose                  | Cellulose paper       | ---               | ---                             | 7.2-91.5      | ~3,50,000 /91.5      | 472/19 s,           | [28]             |
| SnS <sub>2</sub> /rGO      | PET (0.2-0.7 mm)      | Printing          | RT                              | 11-97         | 96.92/ 97            | 6/15 s              | [18]             |
| Graphdiyne                 | PET                   | Ink Printing      | ---                             | 0-50          | 140/43               | 0.29/ 0.36 s        | [19]             |
| Cellulose/ KOH             | Cellulose             | Hydrogel film     | 60 °C/ 24 h                     | 11.3-97.7     | NA                   | 6/10.8 s            | [27]             |
| Cellulose NF/ Carbon black | PEN                   | Ink Printing      | 120 °C/ 5 m                     | 30-90         | 120/90               | 10/6 s              | [24]             |
| MXene/ MWCNT               | MWCNT Fabric          | Drop cast         | UV light                        | 10-90         | 265/90               | 28/66 s (at 50% RH) | [30]             |
| SnO <sub>2</sub>           | Plastic wrap (~10 µm) | Spin coating      | 26.2-40.8 °C / 1 m (NIR anneal) | 15-70         | 3,24,000/ 70         | 90/ 150 s           | <b>This work</b> |
| SnO <sub>2</sub>           | Plastic wrap          | Spin coating      | 26.2-40.8 °C / 1 m (NIR anneal) | 0.1-2.2       | 14/ 2.2              | 30/ 29 to 50 s      | <b>This work</b> |

**Table S2.** Recent metal oxide based humidity sensor under low curing temperature.

| Material                                | substrate    | Deposition method    | Anneal temperature           | Range         | Response(%) / RH%          | Res/Rec time       | Reference        |
|-----------------------------------------|--------------|----------------------|------------------------------|---------------|----------------------------|--------------------|------------------|
| SnO <sub>2</sub>                        | PET          | Spin-spray           | 60 °C/ 1 h                   | 5-95          | 72/95<br>60/70             | 69/47 s            | [43]             |
| In <sub>2</sub> O <sub>3</sub> /GO      | Epoxy        | Drop cast            | 60 °C / 4 h                  | 11-97         | 8,44,200/97<br>~15,000/70  | 15/ 2.5 s          | [26]             |
| In <sub>2</sub> O <sub>3</sub>          | Epoxy        | Drop cast            | 60 °C/ 4 h                   | 11-97         | 2,11,025/97<br>~13,500/70  | 38/ 3 s            | [26]             |
| Au/ZnO<br>ZnO                           | Ceramic      | Drop cast            | 60 °C/ 1 h                   | 11-95         | ~100/95<br>~90/95          | 16/28 s<br>36/44 s | [35]             |
| Cu/CuxO                                 | PC           | Laser direct writing | <100 °C                      | 0-55<br>55-95 | 60/55<br>100/95            | 3/23 s             | [25]             |
| SnO <sub>2</sub> /rGo                   | PI           | Sputter              | 60 °C/ 1 h                   | 11-95         | 1,51,000/90                | 80/4 s             | [41]             |
| gC <sub>3</sub> N <sub>4</sub> /<br>ZnO | PI           | Drop cast            | 60 °C / 12 h                 | 11-95         | 10,50,000/95<br>~99,900/70 | 22/5 s             | [42]             |
| ZnO                                     | PI           | Drop cast            | 60 °C / 12 h                 | 11-95         | 381/95                     | 22/5 s             | [42]             |
| ZnO/ SnO <sub>2</sub>                   | ---          | Paste                | 60 °C / 12 h                 | 11-95         | 12,25,361/95<br>~10,000/70 | 35/8 s             | [44]             |
| SnO <sub>2</sub>                        | ---          | Paste                | 60 °C / 12 h                 | 11-95         | 40,906/95                  | --                 | [44]             |
| SnO <sub>2</sub>                        | Plastic wrap | Spin coating         | NIR anneal<br>26-40 °C / 1 m | 15-70         | 3,24,000/ 70               | 90/ 150 s          | <b>This work</b> |
| SnO <sub>2</sub>                        | Plastic wrap | Spin coating         | NIR anneal<br>26-40 °C / 1 m | 0.1-2.2       | 14/ 2.2                    | 30/ 29 to 50 s     | <b>This work</b> |

**Table S3.** Fabrication of plastic wrap sensor under different annealing condition.

| Plastic wrap<br>(DI water: Ethanol) | Affordable temp.<br>(°C) | Sensor Name | NIR annealing              | Vacuum annealing |
|-------------------------------------|--------------------------|-------------|----------------------------|------------------|
| HDPE/resin (1:1)                    | -46~80                   | S-16        | 16 W/cm <sup>2</sup> (1 m) | 30 min           |
|                                     |                          | S-33        | 33 W/cm <sup>2</sup> (1 m) | 30 min           |
|                                     |                          | S-84        | 84 W/cm <sup>2</sup> (1 m) | 30 min           |
|                                     |                          | S-vac       | NA                         | 60 min           |
| LDPE (4:1)                          | -60~110                  | LDPE-84     | 84 W/cm <sup>2</sup> (1 m) | 60 min           |
| PMP (1:3)                           | -20~160                  | PMP-84      | 84 W/cm <sup>2</sup> (1 m) | 60 min           |

**Table S4.** Atomic concentration (%) measured by XPS.

| Different annealed film                     | C-1s  | O-1s  | Sn-3d | n=[O]/[Sn]<br>in (SnO <sub>n</sub> ) |
|---------------------------------------------|-------|-------|-------|--------------------------------------|
| 16 W/cm <sup>2</sup> (S-16)<br>(HDPE/resin) | 65.69 | 23.41 | 10.90 | 2.14                                 |
| 33 W/cm <sup>2</sup> (S-33)<br>(HDPE/resin) | 66.24 | 23.08 | 10.69 | 2.15                                 |
| 84 W/cm <sup>2</sup> (S-84)<br>(HDPE/resin) | 65.36 | 23.70 | 10.94 | 2.16                                 |
| Vacuum (S-vac)<br>(HDPE/resin)              | 70.82 | 20.17 | 9.02  | 2.23                                 |
| 200 °C (glass)                              | 25.61 | 50.54 | 23.85 | 2.12                                 |
| 350 °C (glass)                              | 16.13 | 55.61 | 28.27 | 1.97                                 |
| 500 °C (glass)                              | 15.78 | 55.93 | 28.29 | 1.97                                 |
